# Supplementary material
Source: PubMed Central journal article supplement (PMC3939432)

# Supplemental Fig. 1

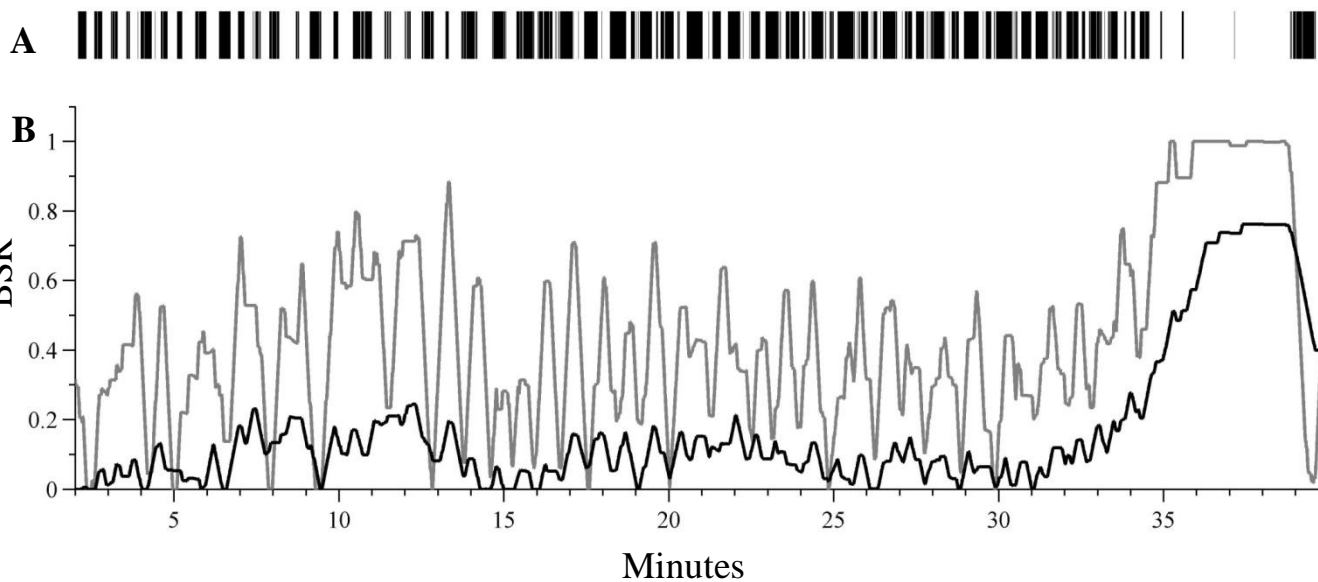

Supplement: NIHMS554064-supplement-burst_suppression_supplement.pdf [file NIHMS554064-supplement-burst_suppression_supplement.pdf]
